# Supplementary material for: Impact of COVID-19 pandemic on medical students: a scoping review protocol
Source: HighWire-hosted journal article supplement (doi:10.1136/bmjopen-2022-061852), 2022-08-01
Supplement: bmjopen-2022-061852supp001_data_supplement.pdf [file bmjopen-2022-061852supp001_data_supplement.pdf]

## Template Data Extraction Form

v1.1.0  
Created 9-Jan-22  
Last Revised 26-May-22

|                  |                                                                                                                                                                                                                                                                                                                                                                                                                            |
|------------------|----------------------------------------------------------------------------------------------------------------------------------------------------------------------------------------------------------------------------------------------------------------------------------------------------------------------------------------------------------------------------------------------------------------------------|
| <b>Title</b>     | The impact of COVID-19 pandemic on medical students: a scoping review                                                                                                                                                                                                                                                                                                                                                      |
| <b>Objective</b> | Currently, there is no article that wholly synthesizes the extent of the impact that the COVID-19 pandemic has on medical students. Therefore, we aim to systematically review the literature for studies that have measured or observed the impact of the pandemic on medical students. To thoroughly examine the effects, we keep the definition of impact open, as to not limit the form of impacts by our assumptions. |
| <b>Question</b>  | What is the impact of the COVID-19 pandemic on medical students?                                                                                                                                                                                                                                                                                                                                                           |

|                                 |                                                                                                                                                                                                                                  |
|---------------------------------|----------------------------------------------------------------------------------------------------------------------------------------------------------------------------------------------------------------------------------|
| <b>Eligibility Criteria</b>     |                                                                                                                                                                                                                                  |
| <b>Population</b>               | ANY medical students not limited to their current placements or year                                                                                                                                                             |
| <b>Concept</b>                  | ANY impact both POSITIVE or NEGATIVE measured on medical students either through subjective measurements and interviews or objective tools, including but not limited to, anxiety, satisfaction, performance, and future outlook |
| <b>Context</b>                  | the research MUST occur in context of the current COVID-19 pandemic, or the changes associated with said conditions, including but not limited to social distancing and the use of digital technology and distance learning      |
| <b>Types of Evidence Source</b> | Peer reviewed articles, NOT a review, NOT a systematic review, and NOT an opinion pieces (letter to the editors, editorials, etc)                                                                                                |

|                           |                                                                                                                                                                                                                                                                                                                                                                                                                                                                                                             |
|---------------------------|-------------------------------------------------------------------------------------------------------------------------------------------------------------------------------------------------------------------------------------------------------------------------------------------------------------------------------------------------------------------------------------------------------------------------------------------------------------------------------------------------------------|
| <b>Form Instructions</b>  |                                                                                                                                                                                                                                                                                                                                                                                                                                                                                                             |
| <b>Author's Name</b>      | Please use the full author's list                                                                                                                                                                                                                                                                                                                                                                                                                                                                           |
| <b>Article Title</b>      | Please use the full article title                                                                                                                                                                                                                                                                                                                                                                                                                                                                           |
| <b>Journal Title</b>      | Please use the full journal title                                                                                                                                                                                                                                                                                                                                                                                                                                                                           |
| <b>Country &amp; Year</b> | <ol style="list-style-type: none"> <li>1. Country is the country in which the research is conducted.</li> <li>2. If done on multiple countries, please specify all participating countries.</li> <li>3. Additionally, specify the year or the period of time in which the research was conducted.</li> </ol>                                                                                                                                                                                                |
| <b>Context</b>            | <ol style="list-style-type: none"> <li>1. Please outline the context in which the research is conducted. For examples whether the researcher focused on social distancing, quarantines, low contact times, distance learning, etc.</li> <li>2. Additionally please specify the original study objective/s.</li> <li>3. If a comparator exists, please specify on what context (situation) was the comparator based upon. I.e historical data, separate independent groups, other faculty members</li> </ol> |
| <b>Population details</b> | <ol style="list-style-type: none"> <li>1. Please specify on what medical student population the research is conducted. E.g placement, year, number of students.</li> <li>2. If a comparator exists, please specify the population characteristics as mentioned above.</li> <li>3. Other characteristics such as randomization methods, age, and other baseline characteristics should also be recorded</li> </ol>                                                                                           |
| <b>Results</b>            | <ol style="list-style-type: none"> <li>1. Please specify the form of impact and the method of impact assessment used by the study. E.g anxiety scores, student satisfaction, student performance, etc and the instruments used to assess the aforementioned impact.</li> <li>2. If a multicenter study, please specify the individual results and the aggregate results if any were reported.</li> <li>3. If a comparator exists, please specify both results</li> </ol>                                    |
| <b>Results Category</b>   | <p>Please categorize the results to one of the following. (May be used more than once)</p> <ol style="list-style-type: none"> <li>1. Educational / Academic</li> <li>2. Physical Health</li> <li>3. Mental Health</li> </ol>                                                                                                                                                                                                                                                                                |

## Results Extraction

| Author's Name | Article Title | Journal Title | Country & Year | Context | Population details | Results | Results Category |
|---------------|---------------|---------------|----------------|---------|--------------------|---------|------------------|
|               |               |               |                |         |                    |         |                  |
